# Supplementary material
Source: PubMed Central journal article supplement (PMC6410710)
Supplement: NIHMS1511986-supplement-1.pdf [file NIHMS1511986-supplement-1.pdf]

**Supplemental Table 1: Changes in visceral adiposity relative to control and characteristics of exercise interventions<sup>a</sup>**

| Author, year              | Duration, months | Type of intervention                                                                                                                                                                                                     | Frequency                                                                                                                                                                                                                          | Dietary component?              | Change in VAT, exercisers (SD)                                                            | Absolute difference relative to control (SD)                                                  |
|---------------------------|------------------|--------------------------------------------------------------------------------------------------------------------------------------------------------------------------------------------------------------------------|------------------------------------------------------------------------------------------------------------------------------------------------------------------------------------------------------------------------------------|---------------------------------|-------------------------------------------------------------------------------------------|-----------------------------------------------------------------------------------------------|
| Friedenreich, 2011        | 12               | Moderate to vigorous aerobic training                                                                                                                                                                                    | 45 minutes/day, 5x/week<br>≥3 facility-based sessions/week                                                                                                                                                                         | No                              | -16.5 (19.7)                                                                              | -14.9 (44.27)                                                                                 |
| Hunter, 2010              | 12               | Aerobic training<br>Resistance training                                                                                                                                                                                  | 40 minutes/day, 2x/week<br>Not directly supervised                                                                                                                                                                                 | Yes (low density balanced diet) | Aerobic: 0.8 (5.2)<br>Resistance: -0.4 (3.66)                                             | Aerobic: -11.60 (5.28)<br>Resistance: -12.8 (6.23)                                            |
| Poehlman, 2000            | 6                | Endurance training<br>Resistance training                                                                                                                                                                                | 3 sessions/week supervised by personal trainer                                                                                                                                                                                     | No                              | Endurance: 1 (3.44)<br>Resistance: 0 (5.3)                                                | Endurance: -4 (1.67)<br>Resistance: -5 (2.49)                                                 |
| Slentz, 2005 <sup>b</sup> | 8                | High amount/vigorous intensity (equivalent to jogging 20 miles a week)<br>Low amount/vigorous intensity (equivalent to jogging 12 miles a week)<br>Low amount/moderate intensity (equivalent to walking 12 miles a week) | Minutes/week at the appropriate intensity<br>Supervision by HR monitor                                                                                                                                                             | No                              | Low/moderate: 2.94 (32.20)<br>Low/vigorous: 3.85 (24.60)<br>High/vigorous: -11.59 (28.62) | Low/moderate: -11.25 (14.11)<br>Low/vigorous: -10.34 (13.54)<br>High/vigorous: -25.78 (13.31) |
| Stewart, 2005             | 6                | Resistance training                                                                                                                                                                                                      | 3 sessions/week supervised<br>Total of 78 prescribed sessions                                                                                                                                                                      | No                              | Women: -14.52 (23.17)<br>Men: -7.38 (27.88)                                               | Women: 14.81 (10.36)<br>Men: -33.17 (14.49)                                                   |
| Donnelly, 2003            | 16               | Moderate-intensity training                                                                                                                                                                                              | Goal calorie expenditure 2000 cal/week<br>Supervised sessions progressing from 20 to 45 minutes<br>Exercises include walking on treadmill, stationary biking and walking on stationary elliptical                                  | No                              | Women: -3.2 (6.93)<br>Men: -22.4 (6.07)                                                   | Women: -6.30 (4.02)<br>Men: -16.10 (7.82)                                                     |
| Mctiernan, 2007           | 12               | Moderate to vigorous aerobic training                                                                                                                                                                                    | 60 minutes/day, 6x/week with additional 5-10 minutes of warm-up, cool down and stretching<br>3 sessions/week supervised                                                                                                            | No                              | Women: -5.9 (14.12)<br>Men: -12.4 (19.59)                                                 | Women: -7.10 (6.29)<br>Men: -6.90 (8.64)                                                      |
| Sigal, 2007               | 6                | Aerobic training<br>Resistance training<br>Combined training                                                                                                                                                             | Aerobic: Progress from 15 to 45 minutes/day over study period. Initial goal HR 60% max HR, increased to 75% max HR<br>Resistance: 7 different exercises, 2 to 3 sets at maximum weight.<br>Combined: full program of both of above | No                              | Combined: -22 (37.18)<br>Aerobic: -13 (37.18)<br>Resistance: -10 (36.47)                  | Combined: -20.0 (16.23)<br>Aerobic: -11.4 (62.4)<br>Resistance: -8.0 (62.4)                   |
| Barone, 2009              | 6                | Combined aerobic and resistance training                                                                                                                                                                                 | 45 minutes/session with target HR 60-90% max HR plus 10-15 minutes of warm up, cool down and 7 resistance exercises per session<br>3 sessions/week, prescribed 62 sessions for 6 months                                            | No                              | -27 (31)                                                                                  | -23.00 (13.65)                                                                                |
| Brochu, 2009              | 6                | Resistance training                                                                                                                                                                                                      | 3 sessions/week supervised<br>Progressing intensity over 6 months                                                                                                                                                                  | Yes (caloric restriction)       | -23 (34)                                                                                  | 0 (14.83)                                                                                     |
| Dobrosielski, 2012        | 6                | Combined resistance and aerobic training                                                                                                                                                                                 | 45 minutes/session<br>3 sessions/week supervised with progressively increasing resistance                                                                                                                                          | No                              | -8.1 (5.2)                                                                                | -6.0 (2.27)                                                                                   |

|                       |    |                           |                   |                        |                                          |                                              |
|-----------------------|----|---------------------------|-------------------|------------------------|------------------------------------------|----------------------------------------------|
| <b>Fujimoto, 2007</b> | 12 | Moderate intense activity | ≥150 minutes/week | Yes, (low dietary fat) | Men: -35.6 (51.3)<br>Women: -25.1 (42.0) | Men: -33.70 (29.83)<br>Women: -24.80 (23.80) |
|-----------------------|----|---------------------------|-------------------|------------------------|------------------------------------------|----------------------------------------------|

<sup>a</sup> SD = standard deviation, VAT = visceral adipose tissue

<sup>b</sup>All data apart from VAT and SAT are for full pool of participants for which n=95, 90, 93, 93, 95, 98, respectively. VAT and SAT measured in subset of patients for whom n is presented in this table

**Supplemental Table 2: Changes in visceral adiposity relative to control and characteristics of pharmacologic interventions<sup>a</sup>**

| Author, year              | Duration, months | Participant characteristics                                                                                                                              | Pharmacologic agent                                      | Dose                                                         | Behavioral component?                                                                                           | Change in VAT, intervention (cm <sup>2</sup> , SD)       | Absolute difference relative to control (cm <sup>2</sup> , SD)                                                     |
|---------------------------|------------------|----------------------------------------------------------------------------------------------------------------------------------------------------------|----------------------------------------------------------|--------------------------------------------------------------|-----------------------------------------------------------------------------------------------------------------|----------------------------------------------------------|--------------------------------------------------------------------------------------------------------------------|
| <b>Kelley, 2004</b>       | 6                | Type 2 diabetics ≤ 5 years<br>Prior antidiabetic medications withdrawn                                                                                   | Orlistat                                                 | 120 mg before each meal                                      | Yes, both groups.<br>Healthy eating and portion control<br>Weekly meetings with nutritionist                    | -67 (14)                                                 | -1.0 (7.09)                                                                                                        |
| <b>Takase, 2012</b>       | 6                | Outpatients with metabolic syndrome and elevated LDL                                                                                                     | Ezetimibe                                                | 10 mg daily                                                  | No                                                                                                              | -12.9 (14.27)                                            | -20.20 (6.29)                                                                                                      |
| <b>Fujimoto, 2007</b>     | 12               | Participants of the Diabetes Prevention Program<br>BMI ≥ 24, fasting glucose 5.3-7 mmol/l, and 2h glucose level of 7.8-11.1 mmol/l<br>Excludes diabetics | Metformin                                                | 850 mg twice daily                                           | No                                                                                                              | -3.1 (30.26)<br>-8.7 (23.26)                             | Men: -1.20 (13.22)<br>Women: -8.40 (10.27)                                                                         |
| <b>Dumont, 2001</b>       | 6                | Viscerally obese men<br><br>Excluded men with known CV disease, diabetes or endocrine disorders                                                          | Gemfibrozil                                              | 1200 mg daily                                                | Yes, both groups<br>Dietary recommendations                                                                     | -20 (13.71)                                              | 3.0 (6)                                                                                                            |
| <b>Despres, 2009</b>      | 12               | Obese patients with dyslipidemia (elevated TGs or reduced HDL)                                                                                           | Rimonabant                                               | 20 mg daily                                                  | Yes, both groups<br>Mildly hypocaloric diet with a deficit of 600 kcal a day relative to estimated energy needs | -36 (42.4)                                               | -20.10 (19.81)                                                                                                     |
| <b>Jansson, 2011</b>      | 6                | Male patients with dyslipidemia<br>Excludes diabetics, HTN and known CV disease                                                                          | Rosuvastatin                                             | 10 mg daily                                                  | Not reported                                                                                                    | -1.5 (27)                                                | -4.30 (11.89)                                                                                                      |
| <b>Astrup, 2012</b>       | 5                | Diabetics excluded                                                                                                                                       | Liraglutide<br>Orlistat                                  | 1.2 mg daily<br>1.8 mg daily<br>2.4 mg daily<br>3.0 mg daily | Yes, both groups<br>Diet and exercise counseling during 2 week run-in                                           | -19.0 (6.3)<br>-19.4 (6.0)<br>-23.0 (5.7)<br>-20.3 (6.0) | 1.2: -5.1 (CI -21.2 to 11)<br>1.8: -5.6 (CI -21.8 to 10.6)<br>2.4: -9.2 (-24.7 to 6.4)<br>3.0: -6.4 (-22.1 to 9.2) |
| <b>Ridderstrale, 2014</b> | 26               | Type 2 diabetics                                                                                                                                         | Empagliflozin + Metformin versus Glimepiride + Metformin | Empagliflozin: 25 mg daily<br>Glimepiride: 1-4 mg daily      | No                                                                                                              | -11.0 (31.86)                                            | -22.2 (64.7)                                                                                                       |

<sup>a</sup> BMI = body mass index, SD = standard deviation, VAT = visceral adipose tissue

**Supplemental Table 3: Mechanism of Action of Included Weight Loss Agents**

| <b>Agent:</b>               | <b>Mechanism of Action in weight loss:</b>                                                                                                                                                               | <b>Approved for use:</b>                                                                   |
|-----------------------------|----------------------------------------------------------------------------------------------------------------------------------------------------------------------------------------------------------|--------------------------------------------------------------------------------------------|
| <b><i>Rimonabant</i></b>    | CB1 receptor blocker <sup>1</sup>                                                                                                                                                                        | Denied by the FDA                                                                          |
| <b><i>Metformin</i></b>     | Centrally acting appetite suppressant. Has been hypothesized to also have effects on fat metabolism and hormonal signaling around satiety and adiposity via mediation of leptin and ghrelin <sup>2</sup> | FDA approved for blood sugar lowering. Not approved for weight loss.                       |
| <b><i>Gemfibrozil</i></b>   | Possibly mediated by fat malabsorption, though this mechanism has not been proven <sup>3</sup>                                                                                                           | FDA approved for lipid regulation. Not approved for weight loss.                           |
| <b><i>Rosuvastatin</i></b>  | No proven mechanism <sup>a</sup>                                                                                                                                                                         | FDA approved as lipid-lowering therapy. Not approved for weight loss.                      |
| <b><i>Ezetimibe</i></b>     | No proven mechanism, but may be related to reduction in intestinal fat absorption <sup>4</sup>                                                                                                           | FDA approved as lipid-lowering therapy. Not approved for weight loss.                      |
| <b><i>Orlistat</i></b>      | Irreversible pancreatic and gastric lipase inhibitor <sup>5</sup>                                                                                                                                        | FDA approved for weight loss with prescription in 1999 and over-the-counter use in 2012.   |
| <b><i>Liraglutide</i></b>   | Glucagon-like peptide (GLP-1) agonist that reduces gastric emptying and glucagon secretion. Also shown to act centrally on the hypothalamus to alter appetite <sup>5</sup>                               | FDA approved for weight loss in 2014.                                                      |
| <b><i>Empagliflozin</i></b> | SGLT2 inhibitor thought to impact weight loss by inducing glucosuria <sup>6</sup>                                                                                                                        | FDA approved for diabetes and cardiovascular risk reduction. Not approved for weight loss. |

<sup>a</sup>Ongoing clinical trial where authors have hypothesized indirect effects of statins may include effects on visceral adipose deposition and weight

### Supplemental Figure 1. Cochrane Risk of Bias Summary

|                   | Random sequence generation (selection bias) | Allocation concealment (selection bias) | Blinding of participants and personnel (performance bias) | Blinding of outcome assessment (detection bias) | Incomplete outcome data (attrition bias) | Selective reporting (reporting bias) | Other bias |
|-------------------|---------------------------------------------|-----------------------------------------|-----------------------------------------------------------|-------------------------------------------------|------------------------------------------|--------------------------------------|------------|
| Astrup 2012       | +                                           | +                                       | +                                                         | +                                               | ?                                        | -                                    | +          |
| Barone 2009       | +                                           | -                                       | +                                                         | ?                                               | +                                        | -                                    | +          |
| Brochu 2009       | +                                           | -                                       | +                                                         | ?                                               | +                                        | +                                    | +          |
| Despres 2009      | +                                           | ?                                       | +                                                         | +                                               | +                                        | -                                    | +          |
| Dobrosielski 2012 | +                                           | -                                       | +                                                         | ?                                               | +                                        | -                                    | +          |
| Donnelly 2003     | +                                           | -                                       | +                                                         | ?                                               | -                                        | +                                    | +          |
| Dumont 2001       | +                                           | -                                       | -                                                         | -                                               | -                                        | ?                                    | ?          |
| Friedenreich 2011 | +                                           | +                                       | +                                                         | +                                               | -                                        | -                                    | +          |
| Fujimoto 2007     | +                                           | ?                                       | ?                                                         | +                                               | ?                                        | ?                                    | +          |
| Hunter 2010       | +                                           | -                                       | +                                                         | ?                                               | -                                        | -                                    | -          |
| Jansson 2011      | +                                           | -                                       | ?                                                         | ?                                               | +                                        | -                                    | -          |
| Kelley 2004       | +                                           | -                                       | +                                                         | +                                               | -                                        | +                                    | +          |
| Mctiernan 2007    | +                                           | +                                       | +                                                         | +                                               | +                                        | -                                    | +          |
| Poehlman 2000     | +                                           | -                                       | +                                                         | ?                                               | -                                        | -                                    | +          |
| Ridderstrale 2014 | +                                           | +                                       | +                                                         | ?                                               | ?                                        | +                                    | +          |
| Sigal 2007        | +                                           | +                                       | +                                                         | +                                               | +                                        | +                                    | +          |
| Slentz 2005       | +                                           | +                                       | +                                                         | ?                                               | -                                        | +                                    | +          |
| Stewart 2005      | +                                           | ?                                       | +                                                         | ?                                               | +                                        | +                                    | +          |
| Takase 2012       | +                                           | -                                       | -                                                         | -                                               | +                                        | +                                    | +          |

Criteria assessed by Cochrane Risk of Bias according to each included study.

+ = meets criterion, ? = unknown if meets criterion, - = does not meet criterion

Supplemental Figure 2. Funnel Plot and Egger's test for Publication Bias

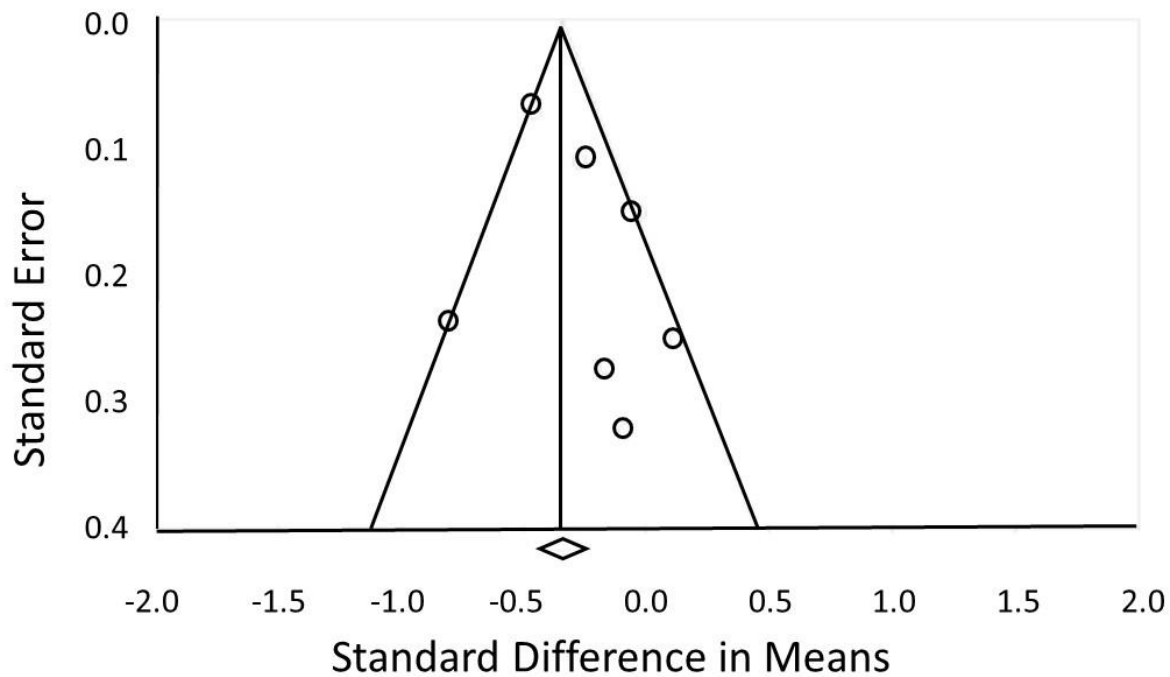

Egger's regression intercept:

|                            |       |
|----------------------------|-------|
| Intercept                  | 1.34  |
| Standard error             | 1.21  |
| 95% lower limit (2-tailed) | -1.78 |
| 95% upper limit (2-tailed) | 4.45  |
| t-value                    | 1.10  |
| df                         | 5     |
| P-value (1-tailed)         | .16   |
| P-value (2-tailed)         | .32   |

Symmetry of the funnel plot along with a non-significant p-value in Egger's test suggest together that there was no significant publication bias.

Supplemental Figure 3. Pooled effect sizes for each intervention across all study outcomes<sup>a</sup>

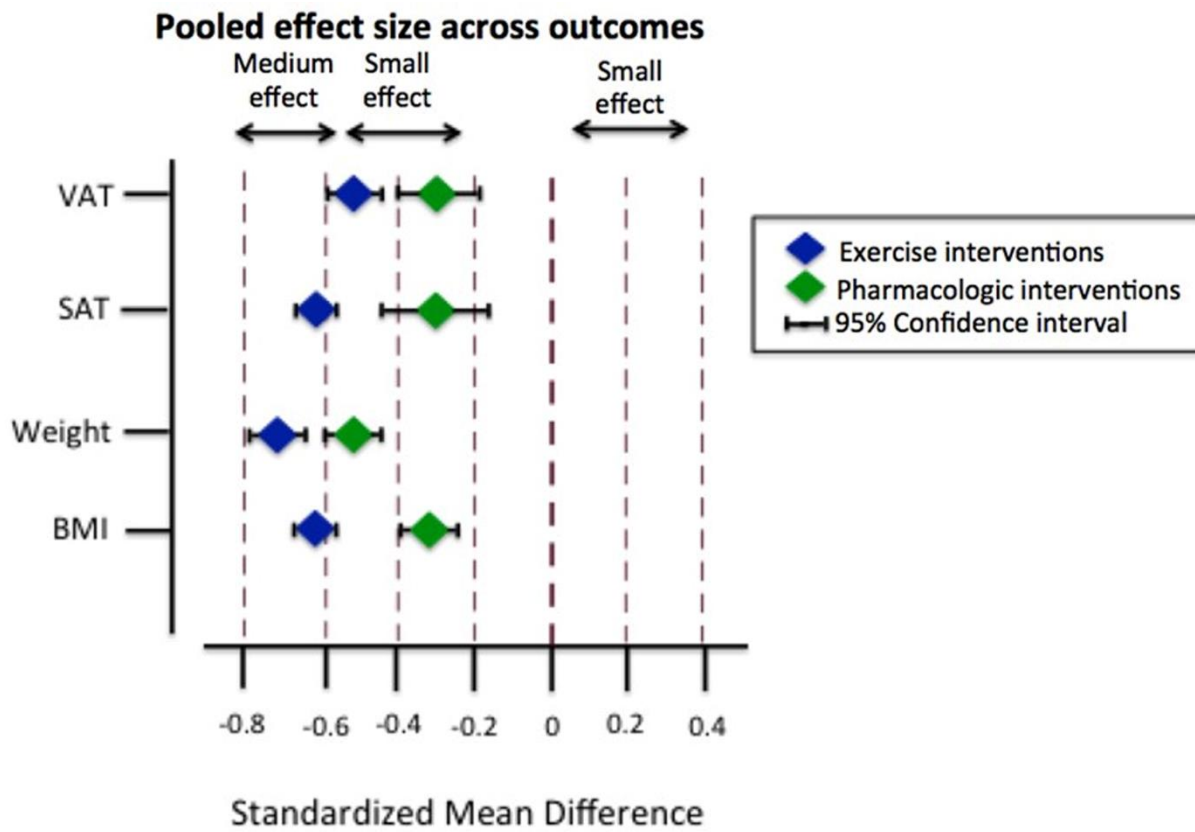

<sup>a</sup>BMI = body mass index, SAT = abdominal subcutaneous adipose tissue, VAT = visceral adipose tissue

## Supplemental References

1. Rodgers RJ, Tschop MH, Wilding JP. Anti-obesity drugs: past, present and future. *Dis Model Mech*. 2012;5(5):621-626.
2. Malin SK, Kashyap SR. Effects of metformin on weight loss: potential mechanisms. *Curr Opin Endocrinol Diabetes Obes*. 2014;21(5):323-329.
3. Robins SJ, Collins D, McNamara JR, Bloomfield HE. Body weight, plasma insulin, and coronary events with gemfibrozil in the Veterans Affairs High-Density Lipoprotein Intervention Trial (VA-HIT). *Atherosclerosis*. 2008;196(2):849-855.
4. Takase H, Dohi Y, Okado T, Hashimoto T, Goto Y, Kimura G. Effects of ezetimibe on visceral fat in the metabolic syndrome: a randomised controlled study. *Eur J Clin Invest*. 2012;42(12):1287-1294.
5. Shettar V, Patel S, Kidambi S. Epidemiology of Obesity and Pharmacologic Treatment Options. *Nutr Clin Pract*. 2017;32(4):441-462.
6. Ridderstrale M, Andersen KR, Zeller C, et al. Comparison of empagliflozin and glimepiride as add-on to metformin in patients with type 2 diabetes: a 104-week randomised, active-controlled, double-blind, phase 3 trial. *Lancet Diabetes Endocrinol*. 2014;2(9):691-700.
